# Supplementary material for: Two reversible transformable mercury(ii) coordination polymers as efficient adsorbents for removal of dibenzothiophene
Source: Royal Society of Chemistry journal article supplement (doi:10.1039/c5ra12686j), 2015-01-01
Supplement: c5ra12686j1.pdf [file c5ra12686j1.pdf]

## Supplementary Information

### Two reversible transformable mercury(II) coordination polymers as efficient adsorbents for removal of dibenzothiophene

Yong Hou<sup>a, b, ‡</sup>, Mohammad Yaser Masoomi<sup>‡</sup>, Minoo Bagheri<sup>c</sup>, Ali Morsali<sup>c\*</sup> and Sang  
Woo Joo<sup>d\*</sup>

<sup>a</sup> Institute of Biotechnology and Nucleic Technology, Sichuan Academy of Agricultural Sciences, Chengdu 610066, Sichuan, China

<sup>b</sup> Sichuan Lanyue Science & Technology Co., Ltd., Shuangliu, 610207, Sichuan, China

<sup>c</sup> Department of Chemistry, Faculty of Sciences, Tarbiat Modares University, Tehran, Islamic Republic of Iran.

E-mail: [morsali\\_a@modares.ac.ir](mailto:morsali_a@modares.ac.ir) (A. Morsali).

<sup>d</sup> School of Mechanical Engineering, Yeungnam University, Gyeongsan 712-749, Republic of Korea

E-mail: [swjoo@yu.ac.kr](mailto:swjoo@yu.ac.kr) (S. W. Joo)

‡ These authors contributed equally to this work.

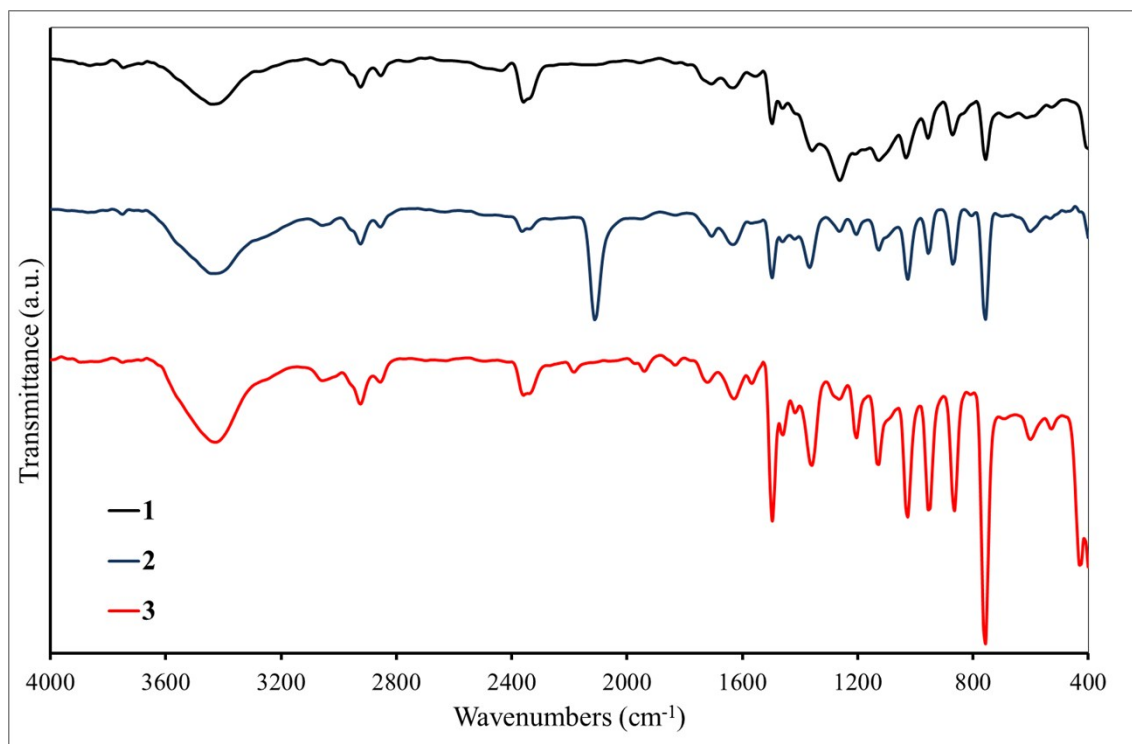

Fig. S1. The IR spectra of compound 1, 2 and 3.

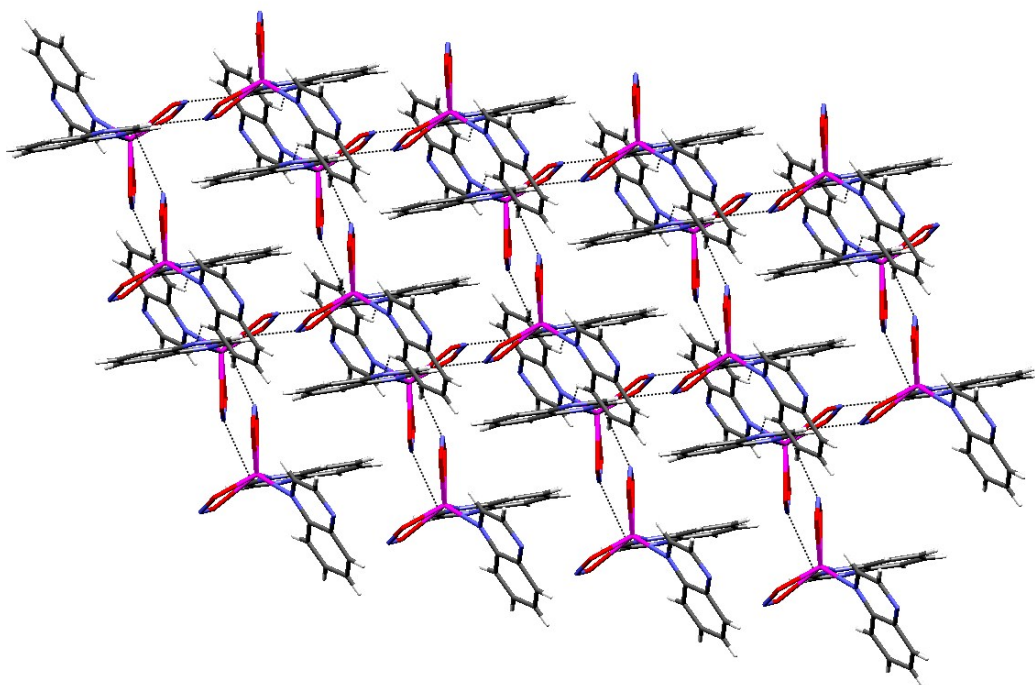

Fig. S2. Showing of the weak hydrogen bonds in the compound 1. Color code: O: red; N: blue; C: gray and Hg: pink.

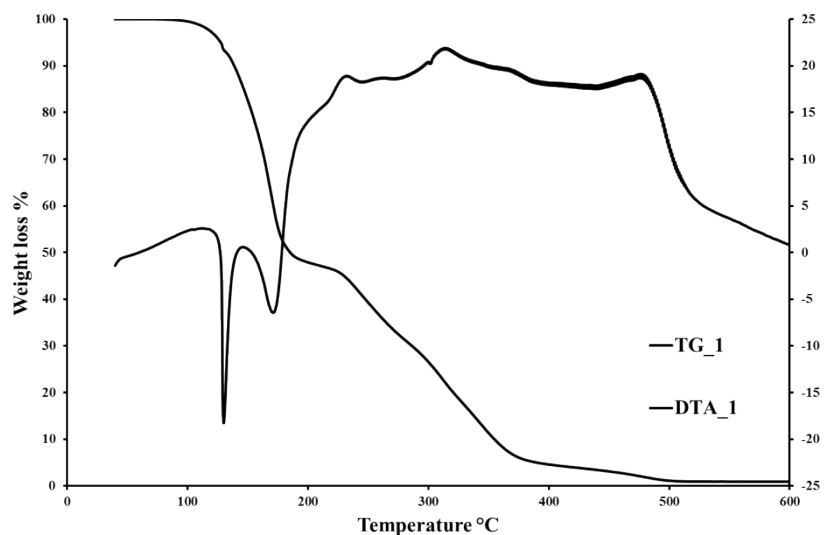

Fig S3. Thermal behaviour of compound  $[\text{Hg}(\text{quinoxaline})_2(\text{NO}_2)_2]_n$  (1).

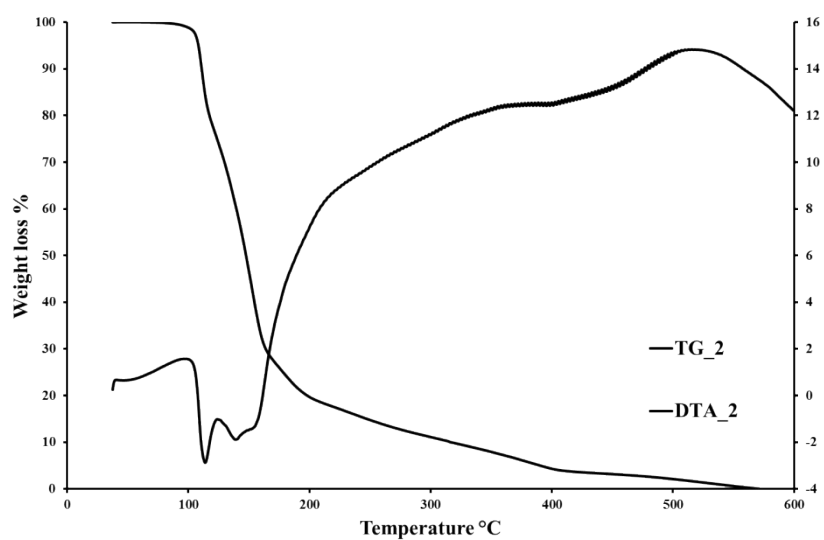

Fig S4. Thermal behaviour of compound  $[\text{Hg}_3(\mu\text{-quinoxaline})_2(\mu\text{-SCN})_6]_n$  (2).

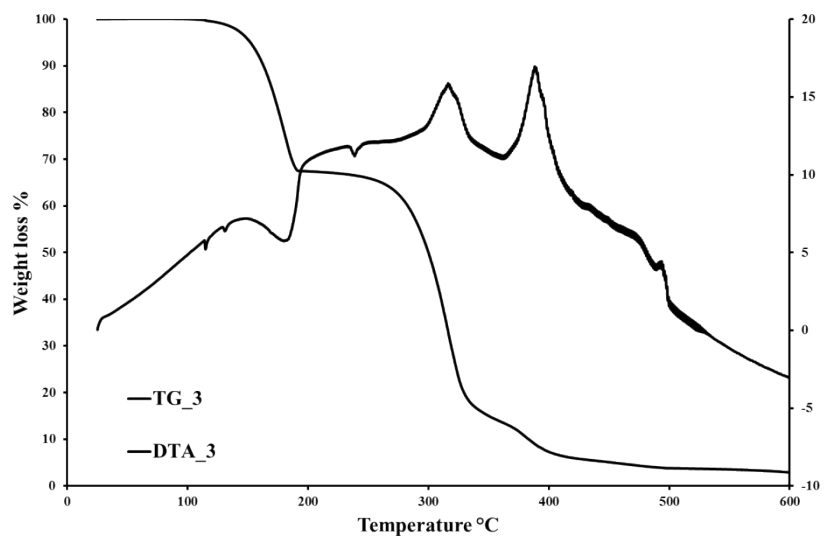

Fig S5. Thermal behaviour of compound  $[\text{Hg}(\mu\text{-quinoxaline})(\mu\text{-CN})_2]_n$  (3).

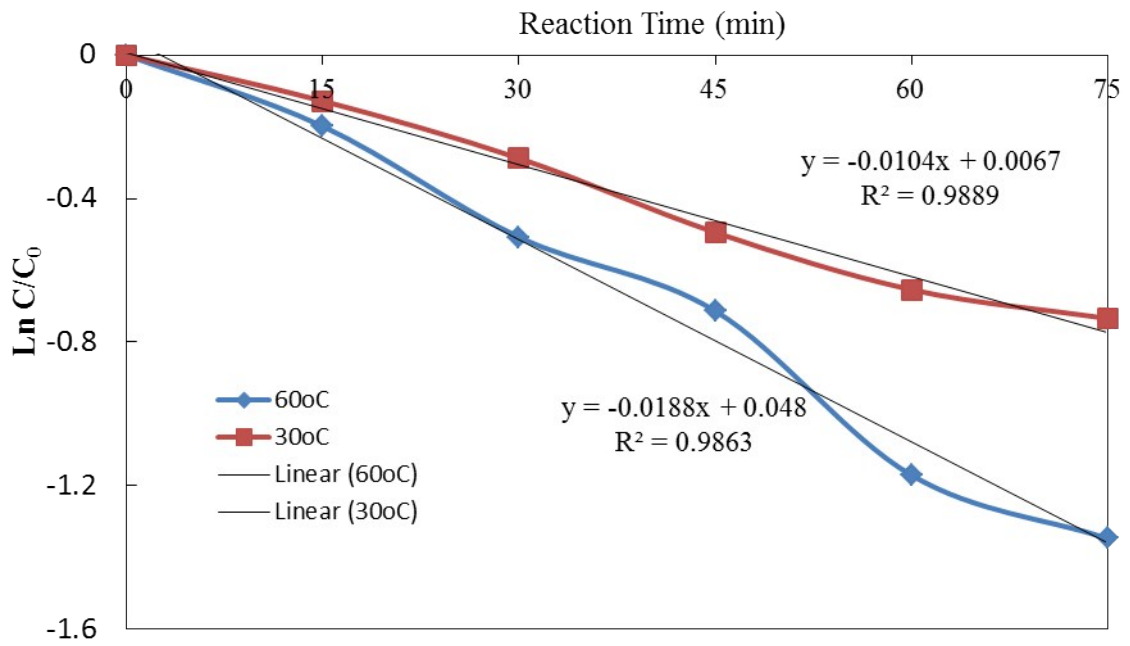

Fig. S6 Reaction kinetics of Removal of DBT over adsorbent of 2 at different temperatures.

**Table S1** Crystal data and structure refinement of [Hg(quinoxaline)<sub>2</sub>(NO<sub>2</sub>)<sub>2</sub>] (**1**), [Hg<sub>3</sub>(μ-quinoxaline)<sub>2</sub>(μ-SCN)<sub>6</sub>]<sub>n</sub> (**2**) and [Hg(μ-quinoxaline)(μ-CN)<sub>2</sub>]<sub>n</sub> (**3**).

|                                            | <b>1</b>                                                        | <b>2</b>                                                                       | <b>3</b>                                        |
|--------------------------------------------|-----------------------------------------------------------------|--------------------------------------------------------------------------------|-------------------------------------------------|
| Empirical formula                          | C <sub>16</sub> H <sub>12</sub> HgN <sub>6</sub> O <sub>4</sub> | C <sub>22</sub> H <sub>12</sub> Hg <sub>3</sub> N <sub>10</sub> S <sub>6</sub> | C <sub>10</sub> H <sub>6</sub> HgN <sub>4</sub> |
| Formula weight                             | 552.91                                                          | 1210.55                                                                        | 382.78                                          |
| Temperature (°K)                           | 298(2)                                                          | 100(2)                                                                         | 180(2)                                          |
| Wavelength (Å)                             | 0.71073                                                         | 0.71073                                                                        | 0.71073                                         |
| Crystal size (mm <sup>3</sup> )            | 0.44 × 0.26 × 0.19                                              | 0.22 × 0.14 × 0.12                                                             | 0.30 × 0.25 × 0.20                              |
| Crystal system                             | Triclinic                                                       | Triclinic                                                                      | Triclinic                                       |
| space group                                | Pī                                                              | Pī                                                                             | Pī                                              |
| a (Å)                                      | 8.441(8)                                                        | 10.6771(13)                                                                    | 10.1350(5)                                      |
| b (Å)                                      | 8.833(9)                                                        | 11.7810(14)                                                                    | 10.1437(5)                                      |
| c (Å)                                      | 12.787(12)                                                      | 13.604(2)                                                                      | 11.0965(6)                                      |
| α (deg)                                    | 80.631(17)                                                      | 105.335(4)                                                                     | 88.561(3)                                       |
| β (deg)                                    | 83.312(17)                                                      | 110.148(4)                                                                     | 88.606(2)                                       |
| γ (deg)                                    | 73.966(16)                                                      | 95.645(3)                                                                      | 68.603(2)                                       |
| Volume (Å <sup>3</sup> )                   | 901.5(15)                                                       | 1515.0(3)                                                                      | 1061.69(9)                                      |
| Z                                          | 2                                                               | 2                                                                              | 4                                               |
| D <sub>calc</sub> (Mg/m <sup>3</sup> )     | 2.037                                                           | 2.654                                                                          | 2.395                                           |
| Absorption coefficient (mm <sup>-1</sup> ) | 8.572                                                           | 15.61                                                                          | 14.466                                          |
| F(000)                                     | 524                                                             | 1100                                                                           | 696                                             |
| θ range for data collection (deg)          | 2.42 to 25.02                                                   | 1.68 to 29.00                                                                  | 2.16 to 26.00                                   |
| Limiting indices                           | -9 ≤ h ≤ 9<br>-10 ≤ k ≤ 10<br>-15 ≤ l ≤ 11                      | -14 ≤ h ≤ 14<br>-16 ≤ k ≤ 16<br>-18 ≤ l ≤ 18                                   | -12 ≤ h ≤ 12<br>-12 ≤ k ≤ 12<br>-13 ≤ l ≤ 13    |
| Reflections collected                      | 3176                                                            | 24644                                                                          | 11907                                           |
| Independent reflections                    | 3045                                                            | 8057                                                                           | 4135 [R(int) = 0.0488]                          |
| Absorption correction                      | Semi-empirical from equivalents                                 | Semi-empirical from equivalents                                                | Multi-scan                                      |
| Completeness to theta                      | 25.02 : 98.9 %                                                  | 29.00 : 99.9 %                                                                 | 26.00 : 98.8 %                                  |

|                                                  |                                                   |                                                   |                                                   |
|--------------------------------------------------|---------------------------------------------------|---------------------------------------------------|---------------------------------------------------|
| Max. and min. transmission                       | 0.2013 and 0.0812                                 | 0.158 and 0.041                                   | 0.1600 and 0.0979                                 |
| Refinement method                                | Full-matrix least-squares on F <sup>2</sup>       | Full-matrix least-squares on F <sup>2</sup>       | Full-matrix least-squares on F <sup>2</sup>       |
| Data / restraints / parameters                   | 3045 / 0 / 244                                    | 8057 / 0 / 371                                    | 4135 / 0 / 244                                    |
| Goodness-of-fit on F <sup>2</sup>                | 1.009                                             | 1.02                                              | 1.093                                             |
| Final R indices [ $I > 2\sigma(I)$ ]             | R <sub>1</sub> = 0.0594, wR <sub>2</sub> = 0.1463 | R <sub>1</sub> = 0.0265, wR <sub>2</sub> = 0.0621 | R <sub>1</sub> = 0.0451, wR <sub>2</sub> = 0.1242 |
| R indices (all data)                             | R <sub>1</sub> = 0.0679, wR <sub>2</sub> = 0.1509 | R <sub>1</sub> = 0.0321, wR <sub>2</sub> = 0.0645 | R <sub>1</sub> = 0.0478, wR <sub>2</sub> = 0.1262 |
| Largest diff. peak and hole (e.Å <sup>-3</sup> ) | 3.101 and -2.606                                  | 2.227 and -1.229                                  | 2.678 and -5.394                                  |

---

**Table S2.** Bond lengths /Å and angles /° for [Hg(quinoxaline)<sub>2</sub>(NO<sub>2</sub>)<sub>2</sub>] (1).

|            |           |                 |          |
|------------|-----------|-----------------|----------|
| Hg(1)-N(3) | 2.366(10) | N(3)-Hg(1)-N(1) | 117.7(3) |
| Hg(1)-N(1) | 2.378(9)  | N(3)-Hg(1)-O(4) | 82.5(4)  |
| Hg(1)-O(4) | 2.437(16) | N(1)-Hg(1)-O(4) | 121.0(7) |
| Hg(1)-O(2) | 2.443(13) | N(3)-Hg(1)-O(2) | 83.8(4)  |
| Hg(1)-O(1) | 2.453(12) | N(1)-Hg(1)-O(2) | 115.0(5) |
| Hg(1)-O(3) | 2.453(14) | O(4)-Hg(1)-O(2) | 122.3(8) |
|            |           | N(3)-Hg(1)-O(1) | 133.4(4) |
|            |           | N(1)-Hg(1)-O(1) | 86.7(4)  |
|            |           | O(4)-Hg(1)-O(1) | 120.1(6) |
|            |           | O(2)-Hg(1)-O(1) | 49.5(4)  |
|            |           | N(3)-Hg(1)-O(3) | 128.6(5) |
|            |           | N(1)-Hg(1)-O(3) | 88.7(6)  |
|            |           | O(4)-Hg(1)-O(3) | 46.8(6)  |
|            |           | O(2)-Hg(1)-O(3) | 126.2(6) |
|            |           | O(1)-Hg(1)-O(3) | 87.8(6)  |

**Table S3.** Bond lengths /Å for [Hg<sub>3</sub>(μ-quinoxaline)<sub>2</sub>(μ-SCN)<sub>6</sub>]<sub>n</sub> (2).

|              |            |              |            |               |            |
|--------------|------------|--------------|------------|---------------|------------|
| Hg(1)-S(3)   | 2.4015(12) | N(1)-Hg(2)   | 2.496(4)   | Hg(3)-S(5)    | 2.4066(12) |
| Hg(1)-S(1)   | 2.4143(12) | Hg(2)-S(4)   | 2.4068(12) | Hg(3)-S(6)    | 2.4171(12) |
| Hg(1)-N(9)   | 2.569(4)   | Hg(2)-S(2)   | 2.4159(11) | Hg(3)-N(6)#4  | 2.636(4)   |
| Hg(1)-N(2)   | 2.622(4)   | Hg(2)-N(18)  | 2.608(4)   | Hg(3)-N(11)   | 2.666(4)   |
| Hg(1)-N(4)#1 | 2.736(4)   | Hg(2)-N(3)#2 | 2.963(4)   | Hg(3)-N(5)#5  | 2.788(4)   |
|              |            | Hg(2)-S(2)#3 | 3.2980(11) | Hg(3)-N(21)#4 | 2.881(4)   |

**Table S4.** Angles /° for [Hg<sub>3</sub>(μ-quinoxaline)<sub>2</sub>(μ-SCN)<sub>6</sub>]<sub>n</sub> (2).

|                   |            |                     |            |                      |            |
|-------------------|------------|---------------------|------------|----------------------|------------|
| S(3)-Hg(1)-S(1)   | 160.02(4)  | S(4)-Hg(2)-S(2)     | 160.75(4)  | S(5)-Hg(3)-S(6)      | 172.99(3)  |
| S(3)-Hg(1)-N(9)   | 103.01(9)  | S(4)-Hg(2)-N(1)     | 94.07(9)   | S(5)-Hg(3)-N(6)#4    | 90.98(9)   |
| S(1)-Hg(1)-N(9)   | 96.32(9)   | S(2)-Hg(2)-N(1)     | 101.13(9)  | S(6)-Hg(3)-N(6)#4    | 94.46(9)   |
| S(3)-Hg(1)-N(2)   | 87.78(10)  | S(4)-Hg(2)-N(18)    | 98.61(9)   | S(5)-Hg(3)-N(11)     | 96.50(9)   |
| S(1)-Hg(1)-N(2)   | 98.59(10)  | S(2)-Hg(2)-N(18)    | 94.53(9)   | S(6)-Hg(3)-N(11)     | 87.71(9)   |
| N(9)-Hg(1)-N(2)   | 86.21(12)  | N(1)-Hg(2)-N(18)    | 84.74(13)  | N(6)#4-Hg(3)-N(11)   | 92.26(12)  |
| S(3)-Hg(1)-N(4)#1 | 100.41(8)  | S(4)-Hg(2)-N(3)#2   | 86.96(8)   | S(5)-Hg(3)-N(5)#5    | 94.70(9)   |
| S(1)-Hg(1)-N(4)#1 | 77.52(8)   | S(2)-Hg(2)-N(3)#2   | 75.40(8)   | S(6)-Hg(3)-N(5)#5    | 80.40(9)   |
| N(9)-Hg(1)-N(4)#1 | 80.96(11)  | N(1)-Hg(2)-N(3)#2   | 165.68(12) | N(6)#4-Hg(3)-N(5)#5  | 171.48(12) |
| N(2)-Hg(1)-N(4)#1 | 166.04(13) | N(18)-Hg(2)-N(3)#2  | 109.26(11) | N(11)-Hg(3)-N(5)#5   | 80.80(11)  |
|                   |            | S(4)-Hg(2)-S(2)#3   | 88.06(4)   | S(5)-Hg(3)-N(21)#4   | 84.39(9)   |
|                   |            | S(2)-Hg(2)-S(2)#3   | 83.22(4)   | S(6)-Hg(3)-N(21)#4   | 91.90(9)   |
|                   |            | N(1)-Hg(2)-S(2)#3   | 79.48(10)  | N(6)#4-Hg(3)-N(21)#4 | 82.85(12)  |
|                   |            | N(18)-Hg(2)-S(2)#3  | 163.28(8)  | N(11)-Hg(3)-N(21)#4  | 175.06(10) |
|                   |            | N(3)#2-Hg(2)-S(2)#3 | 86.29(8)   | N(5)#5-Hg(3)-N(21)#4 | 104.00(12) |

Symmetry transformations used to generate equivalent atoms: #1 x,y-1,z ; #2 x,y+1,z ; #3 -x-3,-y-1,-z-2 ; #4 -x-1,-y-1,-z-1 ; #5 -x-1,-y-2,-z-1

**Table S5.** Bond lengths /Å and angles /° for [Hg( $\mu$ -quinoxaline)( $\mu$ -CN)<sub>2</sub>]<sub>n</sub> (**3**).

|              |           |                     |          |
|--------------|-----------|---------------------|----------|
| Hg(1)-N(1)   | 2.832(11) | N(7)-Hg(1)-N(8)#5   | 172.8(5) |
| Hg(1)-N(3)   | 2.851(13) | C(18)-Hg(1)-C(17)   | 174.6(5) |
| Hg(1)-N(7)   | 2.716(13) | N(2)#1-Hg(2)-N(4)#2 | 176.4(4) |
| Hg(1)-N(8)#5 | 2.839(17) | C(20)-Hg(2)-C(19)   | 176.2(6) |
| Hg(1)-C(18)  | 2.036(12) |                     |          |
| Hg(1)-C(17)  | 2.061(12) |                     |          |
| Hg(2)-N(2)#1 | 2.826(12) |                     |          |
| Hg(2)-N(4)#2 | 2.793(11) |                     |          |
| Hg(2)-N(5)#3 | 2.821(12) |                     |          |
| Hg(2)-N(6)#4 | 2.862(13) |                     |          |
| Hg(2)-C(20)  | 2.011(14) |                     |          |
| Hg(2)-C(19)  | 2.044(15) |                     |          |

**Table S6.** Kinetics equation of DBT removal.

| compound | Order(s)                                  | K <sub>1</sub> (min <sup>-1</sup> ) | R <sub>0</sub> | R <sub>1</sub> | R <sub>2</sub> |
|----------|-------------------------------------------|-------------------------------------|----------------|----------------|----------------|
| <b>2</b> | ln (C <sub>0</sub> /C) = -0.0188t + 0.048 | 0.0188                              | 0.9756         | 0.9863         | 0.9394         |
